# Supplementary material
Source: Springer Nature journal article supplement (https://www.springermedizin.de/resource/supplementary/13047_2013_569_MOESM3_ESM.pdf/9663988)

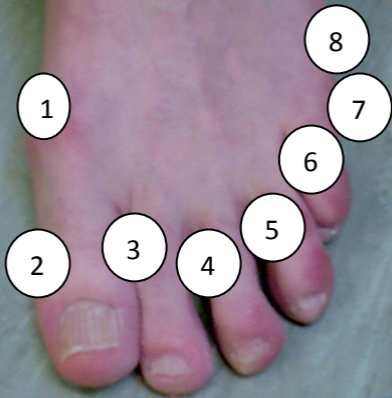

Supplement: MOESM3 [file 9663988]
